# Supplementary material for: Agonist Antagonist Interactions at the Rapidly Desensitizing P2X3 Receptor
Source: PubMed Central journal article supplement (PMC3815160; doi:10.1371/journal.pone.0079213), 2013-11-01
Supplement: pone.0079213.s001.pdf [file pone.0079213.s001.pdf]

**Suppl. Table 1.**

Parameters of the WT P2X3R Markov model (see Fig. 1) for  $\alpha,\beta$ -meATP as agonist and TNP-ATP and A314791 as antagonists

| Rate constants        | TNP      |          |                |                 |                | A317491       |                 |                |  |
|-----------------------|----------|----------|----------------|-----------------|----------------|---------------|-----------------|----------------|--|
|                       | from     | to       | k              | std             | equilibrium    | k             | std             | equilibrium    |  |
| 3a <sub>1</sub>       | 1        | 2        | 5.76           | 0               | 1,582          | 5.76          | 0               | 1.582          |  |
| a <sub>-1</sub>       | 2        | 1        | 3.64           | 0               | 0,6319         | 3.64          | 0               | 0.6319         |  |
| 2a <sub>1</sub>       | 2        | 3        | 3.84           | 0               | 0,5275         | 3.84          | 0               | 0.5275         |  |
| 2a <sub>-1</sub>      | 3        | 2        | 7.28           | 0               | 1,896          | 7.28          | 0               | 1.896          |  |
| a <sub>1</sub>        | 3        | 4        | 1.92           | 0               | 0,1758         | 1.92          | 0               | 0.1758         |  |
| 3a <sub>-1</sub>      | 4        | 3        | 10.92          | 0               | 5,687          | 10.92         | 0               | 5.687          |  |
| 3k <sub>1</sub>       | 1        | 5        | 0.04751        | 4.68E-06        | 0,6358         | 20.06         | 0.0582          | 42.94          |  |
| <b>k<sub>-1</sub></b> | <b>5</b> | <b>1</b> | <b>0.05597</b> | <b>6.10E-06</b> | <b>1,573</b>   | <b>0.4672</b> | <b>0.001365</b> | <b>0.02329</b> |  |
| 2k <sub>1</sub>       | 5        | 8        | 0.03167        | 3.12E-06        | 0,2119         | 13.37         | 0.0388          | 14.31          |  |
| 2k <sub>-1</sub>      | 8        | 5        | 0.1119         | 1.22E-05        | 4,718          | 0.9344        | 0.00273         | 0.06987        |  |
| 2k <sub>1</sub>       | 2        | 6        | 0.03167        | 3.12E-06        | 0,2119         | 13.37         | 0.0388          | 28.62          |  |
| k <sub>-1</sub>       | 6        | 2        | 0.05597        | 6.10E-06        | 4,718          | 0.4672        | 0.001365        | 0.03494        |  |
| <b>k<sub>1</sub></b>  | <b>3</b> | <b>7</b> | <b>0.01584</b> | <b>1.56E-06</b> | <b>0,07064</b> | <b>6.687</b>  | <b>0.0194</b>   | <b>14.31</b>   |  |
| k <sub>-1</sub>       | 7        | 3        | 0.05597        | 6.10E-06        | 14,16          | 0.4672        | 0.001365        | 0.06987        |  |
| 2a <sub>1</sub>       | 5        | 6        | 3.84           | 0               | 0,5275         | 3.84          | 0               | 1.055          |  |
| a <sub>-1</sub>       | 6        | 5        | 3.64           | 0               | 1,896          | 3.64          | 0               | 0.9479         |  |
| a <sub>1</sub>        | 6        | 7        | 1.92           | 0               | 0,1758         | 1.92          | 0               | 0.2637         |  |
| 2a <sub>-1</sub>      | 7        | 6        | 7.28           | 0               | 5,687          | 7.28          | 0               | 3.792          |  |
| a <sub>1</sub>        | 8        | 9        | 1.92           | 0               | 0,1758         | 1.92          | 0               | 0.5275         |  |
| a <sub>-1</sub>       | 9        | 8        | 3.64           | 0               | 5,687          | 3.64          | 0               | 1.896          |  |
| k <sub>1</sub>        | 6        | 9        | 0.01584        | 1.56E-06        | 0,07064        | 6.687         | 0.0194          | 7.156          |  |
| 2k <sub>-1</sub>      | 9        | 6        | 0.1119         | 1.22E-05        | 14,16          | 0.9344        | 0.00273         | 0.1397         |  |
| k <sub>1</sub>        | 8        | 10       | 0.01584        | 1.56E-06        | 0,07064        | 6.687         | 0.0194          | 4.771          |  |
| 3k <sub>-1</sub>      | 10       | 8        | 0.1679         | 1.83E-05        | 14,16          | 1.402         | 0.004095        | 0.2096         |  |
| d <sub>-1</sub>       | 11       | 1        | 273.4          | 0               | 713,9          | 273.4         | 0               | 713.9          |  |
| d <sub>1</sub>        | 1        | 11       | 0.3829         | 0               | 0,001401       | 0.3829        | 0               | 0.001401       |  |
| d <sub>-2</sub>       | 12       | 2        | 8.1            | 0               | 1,247          | 8.1           | 0               | 1.247          |  |
| d <sub>2</sub>        | 2        | 12       | 6.498          | 0               | 0,8022         | 6.498         | 0               | 0.8022         |  |
| d <sub>-3</sub>       | 13       | 3        | 0.03762        | 0               | 0,002175       | 0.03762       | 0               | 0.002175       |  |
| d <sub>3</sub>        | 3        | 13       | 17.3           | 0               | 459,8          | 17.3          | 0               | 459.8          |  |
| d <sub>-4</sub>       | 14       | 4        | 8.28E-05       | 0               | 3,80E-06       | 8.28E-05      | 0               | 3.80E-06       |  |
| d <sub>4</sub>        | 4        | 14       | 21.81          | 0               | 2,63E+05       | 21.81         | 0               | 2.63E+05       |  |
| 3a <sub>1</sub>       | 11       | 12       | 5.76           | 0               | 906,8          | 5.76          | 0               | 906.8          |  |
| 1a <sub>-1</sub>      | 12       | 11       | 0.006352       | 0               | 0,001103       | 0.006352      | 0               | 0.001103       |  |
| 2a <sub>1</sub>       | 12       | 13       | 3.84           | 0               | 302,3          | 3.84          | 0               | 302.3          |  |
| 2a <sub>-1</sub>      | 13       | 12       | 0.0127         | 0               | 0,003308       | 0.0127        | 0               | 0.003308       |  |
| a <sub>1</sub>        | 13       | 14       | 1.92           | 0               | 100,8          | 1.92          | 0               | 100.8          |  |
| 3a <sub>-1</sub>      | 14       | 13       | 0.01906        | 0               | 0,009925       | 0.01906       | 0               | 0.009925       |  |
| d <sub>-1</sub>       | 15       | 5        | 273.4          | 0               | 713,9          | 273.4         | 0               | 713.9          |  |
| d <sub>1</sub>        | 5        | 15       | 0.3829         | 0               | 0,001401       | 0.3829        | 0               | 0.001401       |  |
| d <sub>-2</sub>       | 16       | 6        | 8.1            | 0               | 1,247          | 8.1           | 0               | 1.247          |  |
| d <sub>2</sub>        | 6        | 16       | 6.498          | 0               | 0,8022         | 6.498         | 0               | 0.8022         |  |
| d <sub>-3</sub>       | 17       | 7        | 0.03762        | 0               | 0,002175       | 0.03762       | 0               | 0.002175       |  |
| d <sub>3</sub>        | 7        | 17       | 17.3           | 0               | 459,8          | 17.3          | 0               | 459.8          |  |
| 2a <sub>1</sub>       | 15       | 16       | 3.84           | 0               | 302,3          | 3.84          | 0               | 604.5          |  |
| a <sub>-1</sub>       | 16       | 15       | 0.006352       | 0               | 0,003308       | 0.006352      | 0               | 0.001654       |  |
| a <sub>1</sub>        | 16       | 17       | 1.92           | 0               | 100,8          | 1.92          | 0               | 151.1          |  |
| 2a <sub>-1</sub>      | 17       | 16       | 0.0127         | 0               | 0,009925       | 0.0127        | 0               | 0.006617       |  |
| 3k <sub>1</sub>       | 11       | 15       | 0.04751        | 4.68E-06        | 0,6358         | 20.06         | 0.0582          | 42.94          |  |
| k <sub>-1</sub>       | 15       | 11       | 0.05597        | 6.10E-06        | 1,573          | 0.4672        | 0.001365        | 0.02329        |  |
| 2k <sub>1</sub>       | 12       | 16       | 0.03167        | 3.12E-06        | 0,2119         | 13.37         | 0.0388          | 28.62          |  |

|                   |      |    | TNP      |          |             | A317491  |          |             |
|-------------------|------|----|----------|----------|-------------|----------|----------|-------------|
| Rate constants    | from | to | k        | std      | equilibrium | k        | std      | equilibrium |
| k <sub>-1</sub>   | 16   | 12 | 0.05597  | 6.10E-06 | 4,718       | 0.4672   | 0.001365 | 0.03493     |
| k <sub>1</sub>    | 13   | 17 | 0.01584  | 1.56E-06 | 0,07064     | 6.687    | 0.0194   | 14.31       |
| k <sub>-1</sub>   | 17   | 13 | 0.05597  | 6.10E-06 | 14,16       | 0.4672   | 0.001365 | 0.06987     |
| a <sub>1</sub>    | 18   | 19 | 1.92     | 0        | 100,8       | 1.92     | 0        | 302.3       |
| a <sub>-1</sub>   | 19   | 18 | 0.006352 | 0        | 0,009925    | 0.006352 | 0        | 0.003308    |
| d <sub>-2</sub>   | 19   | 9  | 8.1      | 0        | 1,247       | 8.1      | 0        | 1.247       |
| d <sub>2</sub>    | 9    | 19 | 6.498    | 0        | 0,8022      | 6.498    | 0        | 0.8022      |
| d <sub>-1</sub>   | 18   | 8  | 273.4    | 0        | 713,9       | 273.4    | 0        | 713.9       |
| d <sub>1</sub>    | 8    | 18 | 0.3829   | 0        | 0,001401    | 0.3829   | 0        | 0.001401    |
| 2k <sub>1</sub>   | 15   | 18 | 0.03167  | 3.12E-06 | 0,2119      | 13.37    | 0.0388   | 14.31       |
| 2k <sub>-1</sub>  | 18   | 15 | 0.1119   | 1.22E-05 | 4,718       | 0.9344   | 0.00273  | 0.06987     |
| k <sub>1</sub>    | 16   | 19 | 0.01584  | 1.56E-06 | 0,07064     | 6.687    | 0.0194   | 7.156       |
| 2 k <sub>-1</sub> | 19   | 16 | 0.1119   | 1.22E-05 | 14,16       | 0.9344   | 0.00273  | 0.1397      |
| d <sub>-1</sub>   | 20   | 10 | 273.4    | 0        | 713,9       | 273.4    | 0        | 713.9       |
| d <sub>1</sub>    | 10   | 20 | 0.3829   | 0        | 0,001401    | 0.3829   | 0        | 0.001401    |
| k <sub>1</sub>    | 18   | 20 | 0.01584  | 1.56E-06 | 0,07064     | 6.687    | 0.0194   | 4.771       |
| 3k <sub>-1</sub>  | 20   | 18 | 0.1679   | 1.83E-05 | 14,16       | 1.402    | 0.004095 | 0.2096      |
| o <sub>1</sub>    | 7    | 23 | 1.00E+04 | 0        | 10          | 1.00E+04 | 0        | 10          |
| o <sub>-1</sub>   | 23   | 7  | 1000     | 0        | 0,1         | 1000     | 0        | 0.1         |
| k <sub>-1</sub>   | 23   | 21 | 0.05597  | 6.10E-06 | 14,18       | 0.4672   | 0.001365 | 0.07006     |
| k <sub>1</sub>    | 21   | 23 | 0.01579  | 1.56E-06 | 0,07051     | 6.669    | 0.01935  | 14.27       |
| o <sub>-1</sub>   | 21   | 3  | 1000     | 0        | 0,1         | 1000     | 0        | 0.1         |
| o <sub>1</sub>    | 3    | 21 | 1.00E+04 | 0        | 10          | 1.00E+04 | 0        | 10          |
| o <sub>1</sub>    | 4    | 22 | 1.00E+04 | 0        | 10          | 1.00E+04 | 0        | 10          |
| o <sub>-1</sub>   | 22   | 4  | 1000     | 0        | 0,1         | 1000     | 0        | 0.1         |
| 3a <sub>-1</sub>  | 22   | 21 | 10.92    | 0        | 5,688       | 10.92    | 0        | 5.688       |
| a <sub>1</sub>    | 21   | 22 | 1.92     | 0        | 0,1758      | 1.92     | 0        | 0.1758      |

Constraints:

- ScaleRate: 1 2 2 3
- ScaleRate: 1 2 3 4
- ScaleRate: 1 2 21 22
- ScaleRate: 1 2 11 12
- ScaleRate: 1 2 12 13
- ScaleRate: 1 2 13 14
- ScaleRate: 2 1 3 2
- ScaleRate: 2 1 4 3
- ScaleRate: 2 1 22 21
- ScaleRate: 12 11 13 12
- ScaleRate: 12 11 14 13
- ScaleRate: 1 11 2 12
- ScaleRate: 1 11 3 13
- ScaleRate: 1 11 4 14
- ScaleRate: 11 1 12 2
- ScaleRate: 11 1 13 3
- ScaleRate: 11 1 14 4
- ScaleRate: 1 2 5 6
- ScaleRate: 1 5 2 6
- ScaleRate: 1 5 3 7
- ScaleRate: 1 5 11 15
- ScaleRate: 1 5 12 16
- ScaleRate: 1 5 13 17
- ScaleRate: 5 1 6 2
- ScaleRate: 5 1 7 3
- ScaleRate: 5 1 15 11
- ScaleRate: 5 1 16 12

ScaleRate: 5 1 17 13  
ScaleRate: 2 1 6 5  
ScaleRate: 1 11 5 15  
ScaleRate: 11 1 15 5  
ScaleRate: 12 11 16 15  
ScaleRate: 5 6 6 7  
ScaleRate: 5 6 15 16  
ScaleRate: 5 6 16 17  
ScaleRate: 6 5 7 6  
ScaleRate: 16 15 17 16  
ScaleRate: 5 15 6 16  
ScaleRate: 5 15 7 17  
ScaleRate: 15 5 16 6  
ScaleRate: 15 5 17 7  
ScaleRate: 1 2 8 9  
ScaleRate: 2 1 9 8  
ScaleRate: 1 5 5 8  
ScaleRate: 1 5 6 9  
ScaleRate: 1 5 15 18  
ScaleRate: 1 5 16 19  
ScaleRate: 1 11 8 18  
ScaleRate: 11 1 18 8  
ScaleRate: 5 1 8 5  
ScaleRate: 5 1 9 6  
ScaleRate: 5 1 18 15  
ScaleRate: 5 1 19 16  
ScaleRate: 12 11 19 18  
ScaleRate: 8 9 18 19  
ScaleRate: 8 18 9 19  
ScaleRate: 18 8 19 9  
ScaleRate: 1 11 10 20  
ScaleRate: 11 1 20 10  
ScaleRate: 1 5 8 10  
ScaleRate: 1 5 18 20  
ScaleRate: 5 1 10 8  
ScaleRate: 5 1 20 18  
FixRate: 3 21  
FixRate: 21 3  
FixRate: 7 23  
ScaleRate: 1 5 21 23  
ScaleRate: 5 1 23 21  
FixRate: 23 7  
FixRate: 4 22  
FixRate: 22 4  
LoopBal: 3 2 12 13 14 4  
FixRate: 1 2  
FixRate: 2 1  
FixRate: 1 11  
FixRate: 11 1
